# Supplementary material
Source: publisher site journal article supplement (https://www.dovepress.com/article/342357)
Supplement: Supplementary file 1 [file get_supplementary_file.php]

**Appendix 1: Diagnostic read codes used to define upper respiratory tract infections for analysis of secondary objectives.**

| Read code | Read term                                               |
|-----------|---------------------------------------------------------|
| 1C9..     | Sore throat symptom                                     |
| 1C92.     | Has a sore throat                                       |
| 1C93.     | Persistent sore throat                                  |
| 1C9Z.     | Sore throat symptom NOS                                 |
| 2DB6.     | O/E - follicular tonsillitis                            |
| 2DC2.     | O/E - granular pharyngitis                              |
| A123.     | Tuberculous laryngitis                                  |
| A34..     | Streptococcal sore throat and scarlatina                |
| A340.     | Streptococcal sore throat                               |
| A3401     | Streptococcal laryngitis                                |
| A3402     | Streptococcal pharyngitis                               |
| A3403     | Streptococcal tonsillitis                               |
| A340z     | Streptococcal sore throat NOS                           |
| A34z.     | Streptococcal sore throat with scarlatina NOS           |
| A3830     | Fusobacterial necrotising tonsillitis                   |
| A552.     | Postmeasles otitis media                                |
| AA12.     | Vincent's pharyngitis                                   |
| F51..     | Nonsuppurative otitis media + eustachian tube disorders |
| F510.     | Acute non suppurative otitis media                      |
| F5100     | Acute otitis media with effusion                        |
| F5101     | Acute serous otitis media                               |
| F5102     | Acute mucoid otitis media                               |
| F5103     | Acute sanguinous otitis media                           |
| F5104     | Acute allergic serous otitis media                      |
| F5106     | Acute allergic sanguinous otitis media                  |
| F510z     | Acute nonsuppurative otitis media NOS                   |
| F511.     | Chronic otitis media with effusion, serous              |
| F5111     | Serosanguinous chronic otitis media                     |
| F511z     | Chronic serous otitis media NOS                         |
| F512.     | Chronic otitis media with effusion, mucoid              |
| F5121     | Mucosanguinous chronic otitis media                     |
| F512z     | Chronic mucoid otitis media NOS                         |
| F513.     | Chronic otitis media with effusion, other               |
| F5130     | Chronic allergic otitis media                           |
| F5131     | Chronic otitis media with effusion, purulent            |
| F513z     | Other chronic nonsuppurative otitis media NOS           |
| F514.     | Unspecified nonsuppurative otitis media                 |
| F5140     | Allergic otitis media NOS                               |
| F5141     | Serous otitis media NOS                                 |
| F5142     | Catarrhal otitis media NOS                              |
| F5143     | Mucoid otitis media NOS                                 |
| F514z     | Nonsuppurative otitis media NOS                         |

|       |                                                            |
|-------|------------------------------------------------------------|
| F518. | Chronic otitis media with effusion, unspecified            |
| F52.. | Suppurative and unspecified otitis media                   |
| F520. | Acute suppurative otitis media                             |
| F5200 | Acute suppurative otitis media tympanic membrane intact    |
| F5201 | Acute suppurative otitis media tympanic membrane ruptured  |
| F5203 | Acute suppurative otitis media due to disease EC           |
| F520z | Acute suppurative otitis media NOS                         |
| F521. | Chronic suppurative otitis media, tubotympanic             |
| F522. | Chronic suppurative otitis media, atticofurcal             |
| F523. | Chronic suppurative otitis media NOS                       |
| F524. | Purulent otitis media NOS                                  |
| F5240 | Bilateral suppurative otitis media                         |
| F525. | Recurrent acute otitis media                               |
| F526. | Acute left otitis media                                    |
| F527. | Acute right otitis media                                   |
| F528. | Acute bilateral otitis media                               |
| F52z. | Otitis media NOS                                           |
| F540. | Acute myringitis without otitis media                      |
| F541. | Chronic myringitis without mention of otitis media         |
| FyuP0 | [X]Other acute nonsuppurative otitis media                 |
| FyuP2 | [X]Other chronic suppurative otitis media                  |
| FyuP3 | [X]Otitis media in bacterial diseases classified elsewhere |
| FyuP4 | [X]Otitis media in viral diseases classified elsewhere     |
| FyuP5 | [X]Otitis media in other diseases classified elsewhere     |
| H00.. | Acute nasopharyngitis                                      |
| H01.. | Acute sinusitis                                            |
| H010. | Acute maxillary sinusitis                                  |
| H011. | Acute frontal sinusitis                                    |
| H012. | Acute ethmoidal sinusitis                                  |
| H013. | Acute sphenoidal sinusitis                                 |
| H01y. | Other acute sinusitis                                      |
| H01y0 | Acute pansinusitis                                         |
| H01yz | Other acute sinusitis NOS                                  |
| H01z. | Acute sinusitis NOS                                        |
| H02.. | Acute pharyngitis                                          |
| H020. | Acute gangrenous pharyngitis                               |
| H021. | Acute phlegmonous pharyngitis                              |
| H022. | Acute ulcerative pharyngitis                               |
| H023. | Acute bacterial pharyngitis                                |
| H0230 | Acute pneumococcal pharyngitis                             |
| H0231 | Acute staphylococcal pharyngitis                           |
| H023z | Acute bacterial pharyngitis NOS                            |
| H024. | Acute viral pharyngitis                                    |
| H025. | Allergic pharyngitis                                       |
| H02z. | Acute pharyngitis NOS                                      |
| H03.. | Acute tonsillitis                                          |

|       |                                             |
|-------|---------------------------------------------|
| H030. | Acute erythematous tonsillitis              |
| H031. | Acute follicular tonsillitis                |
| H032. | Acute ulcerative tonsillitis                |
| H033. | Acute catarrhal tonsillitis                 |
| H034. | Acute gangrenous tonsillitis                |
| H035. | Acute bacterial tonsillitis                 |
| H0350 | Acute pneumococcal tonsillitis              |
| H0351 | Acute staphylococcal tonsillitis            |
| H035z | Acute bacterial tonsillitis NOS             |
| H036. | Acute viral tonsillitis                     |
| H037. | Recurrent acute tonsillitis                 |
| H03z. | Acute tonsillitis NOS                       |
| H04.. | Acute laryngitis and tracheitis             |
| H040. | Acute laryngitis                            |
| H0400 | Acute oedematous laryngitis                 |
| H0401 | Acute ulcerative laryngitis                 |
| H0402 | Acute catarrhal laryngitis                  |
| H0403 | Acute phlegmonous laryngitis                |
| H0404 | Acute haemophilus influenzae laryngitis     |
| H0406 | Acute suppurative laryngitis                |
| H040w | Acute viral laryngitis unspecified          |
| H040x | Acute bacterial laryngitis unspecified      |
| H040z | Acute laryngitis NOS                        |
| H04z. | Acute laryngitis and tracheitis NOS         |
| H050. | Acute laryngopharyngitis                    |
| H051. | Acute upper respiratory tract infection     |
| H053. | Tracheopharyngitis                          |
| H054. | Recurrent upper respiratory tract infection |
| H055. | Pharyngolaryngitis                          |
| H0605 | Acute tracheobronchitis                     |
| H12.. | Chronic pharyngitis and nasopharyngitis     |
| H121. | Chronic pharyngitis                         |
| H1210 | Simple chronic pharyngitis                  |
| H1211 | Atrophic pharyngitis                        |
| H1212 | Granular pharyngitis                        |
| H1213 | Hypertrophic pharyngitis                    |
| H1214 | Pharyngitis keratosa                        |
| H1215 | Pharyngitis sicca                           |
| H1216 | Chronic follicular pharyngitis              |
| H121z | Chronic pharyngitis NOS                     |
| H122. | Chronic nasopharyngitis                     |
| H12z. | Chronic pharyngitis and nasopharyngitis NOS |
| H13.. | Chronic sinusitis                           |
| H130. | Chronic maxillary sinusitis                 |
| H131. | Chronic frontal sinusitis                   |
| H132. | Chronic ethmoidal sinusitis                 |

|       |                                                       |
|-------|-------------------------------------------------------|
| H133. | Chronic sphenoidal sinusitis                          |
| H135. | Recurrent sinusitis                                   |
| H13y. | Other chronic sinusitis                               |
| H13y0 | Chronic pansinusitis                                  |
| H13y1 | Pansinusitis                                          |
| H13yz | Other chronic sinusitis NOS                           |
| H13z. | Chronic sinusitis NOS                                 |
| H140. | Chronic tonsillitis                                   |
| H143. | Chronic adenotonsillitis                              |
| H14y5 | Caseous tonsillitis                                   |
| H14y6 | Lingular tonsillitis                                  |
| H16.. | Chronic laryngitis and laryngotracheitis              |
| H160. | Chronic laryngitis                                    |
| H1600 | Chronic simple laryngitis                             |
| H1601 | Chronic catarrhal laryngitis                          |
| H1602 | Chronic hypertrophic laryngitis                       |
| H1603 | Chronic atrophic laryngitis                           |
| H1604 | Laryngitis sicca                                      |
| H160z | Chronic laryngitis NOS                                |
| H16z. | Chronic laryngitis NOS                                |
| H2710 | Influenza with laryngitis                             |
| H2711 | Influenza with pharyngitis                            |
| H300. | Tracheobronchitis NOS                                 |
| H301. | Laryngotracheobronchitis                              |
| H31y1 | Chronic tracheobronchitis                             |
| Hyu00 | [X]Other acute sinusitis                              |
| Hyu01 | [X]Acute pharyngitis due to other specified organisms |
| Hyu02 | [X]Acute tonsillitis due to other specified organisms |
| Hyu22 | [X]Other chronic sinusitis                            |
| X00mG | Pharyngitis                                           |
| X00mq | Vincent's tonsillitis                                 |
| X00n2 | Vincent's laryngitis                                  |
| X1002 | Acute upper respiratory infection                     |
| X1003 | Viral upper respiratory tract infection NOS           |
| X70ld | Fusobacterial necrotising tonsillitis                 |
| Xa05b | Acute laryngitis and tracheitis                       |
| Xa7I0 | Tonsillitis                                           |
| Xa9Bk | Otitis media with effusion - serous                   |
| Xa9BI | Otitis media with effusion - mucoid                   |
| Xa9Bm | Otitis media with effusion - purulent                 |
| XE0sE | Sore throat symptom                                   |
| XE0XI | Common cold                                           |
| XE0Xm | Acute sinusitis                                       |
| XE0Xn | Acute pharyngitis                                     |
| XE0Xq | Upper respiratory infection NOS                       |
| XE0Xz | Chronic pharyngitis                                   |

|       |                                                             |
|-------|-------------------------------------------------------------|
| XE0Y0 | Chronic maxillary sinusitis                                 |
| XE0Y1 | Chronic frontal sinusitis                                   |
| XE0Y3 | Chronic tonsillitis                                         |
| XE17C | Chronic non-suppurative otitis media with effusion - mucoid |
| XE17D | Otitis media NOS                                            |
| XE1ok | Barotrauma, otitic                                          |
| XE2aC | Acute tonsillitis                                           |
| XE2QD | Acute otitis media with effusion                            |
| XM1QH | Sinusitis                                                   |
| XM1QI | Maxillary sinusitis                                         |
| XM1QJ | Frontal sinusitis                                           |
| XM1QM | Sore throat - chronic                                       |
| XM1QW | Respiratory tract infection                                 |

**Appendix 2: Diagnostic read codes used to define lower respiratory tract infections for analysis of secondary objectives**

| Read code | Read term                                                  |
|-----------|------------------------------------------------------------|
| 65VA.     | Notification of whooping cough                             |
| A0222     | Salmonella pneumonia                                       |
| A054.     | Amoebic lung abscess                                       |
| A11..     | Pulmonary tuberculosis                                     |
| A110.     | Infiltrative lung tuberculosis                             |
| A111.     | Nodular lung tuberculosis                                  |
| A112.     | Tuberculosis of lung with cavitation                       |
| A113.     | Tuberculosis of bronchus                                   |
| A115.     | Tuberculous bronchiectasis                                 |
| A116.     | Tuberculous pneumonia                                      |
| A11y.     | Other specified pulmonary tuberculosis                     |
| A11z.     | Pulmonary tuberculosis NOS                                 |
| A1202     | Tuberculous hydrothorax                                    |
| A1221     | Isolated bronchial tuberculosis                            |
| A1240     | TB lung confirm sputum microscopy with or without culture  |
| A1241     | Tuberculosis of lung, confirmed by culture only            |
| A1242     | Tuberculosis of lung, confirmed histologically             |
| A1243     | Tuberculosis of lung, confirmed by unspecified means       |
| A1251     | Tuberculosis lung bact and histological examin not done    |
| A203.     | Primary pneumonic plague                                   |
| A204.     | Secondary pneumonic plague                                 |
| A205.     | Pneumonic plague, unspecified                              |
| A33..     | Whooping cough                                             |
| A330.     | Bordetella pertussis                                       |
| A331.     | Bordetella parapertussis                                   |
| A33y.     | Whooping cough - other specified organism                  |
| A33y0     | Bordetella bronchiseptica                                  |
| A33yz     | Other whooping cough NOS                                   |
| A33z.     | Whooping cough NOS                                         |
| A3B3.     | Friedlander's bacillus infection                           |
| A3BX4     | Streptococ pneumon/cause/disease classified/oth chapters   |
| A3BXA     | Mycoplasma pneumoniae [PPLO] cause/dis classifd/oth chaptr |
| A3BXB     | Klebsiella pneumoniae/cause/disease classifd/oth chapters  |
| A3By1     | Eaton's agent infection                                    |
| A3By4     | Pleuropneumonia-like organism (PPLO) infection             |
| A73x.     | Ornithosis with other specified complications              |
| A73y.     | Ornithosis with unspecified complications                  |
| A73z.     | Unspecified Ornithosis                                     |
| AB24.     | Candidiasis of lung                                        |
| AB30.     | Primary pulmonary coccidioidomycosis                       |
| AB405     | Histoplasma capsulatum with pneumonia                      |

|       |                                                        |
|-------|--------------------------------------------------------|
| AB415 | Histoplasma duboisii with pneumonia                    |
| AB501 | Primary pulmonary blastomycosis                        |
| AB504 | Acute pulmonary blastomycosis                          |
| AB511 | Pulmonary paracoccidioidomycosis                       |
| AB636 | Aspergillus bronchitis                                 |
| AD04. | Toxoplasma pneumonitis                                 |
| Ayu39 | [X]Whooping cough due to other Bordetella species      |
| Ayu3A | [X]Whooping cough, unspecified                         |
| H06.. | Acute bronchitis and bronchiolitis                     |
| H060. | Acute bronchitis                                       |
| H0600 | Acute fibrinous bronchitis                             |
| H0601 | Acute membranous bronchitis                            |
| H0602 | Acute pseudomembranous bronchitis                      |
| H0603 | Acute purulent bronchitis                              |
| H0604 | Acute croupous bronchitis                              |
| H0605 | Acute tracheobronchitis                                |
| H0606 | Acute pneumococcal bronchitis                          |
| H0607 | Acute streptococcal bronchitis                         |
| H0608 | Acute haemophilus influenzae bronchitis                |
| H0609 | Acute neisseria catarrhalis bronchitis                 |
| H060A | Acute bronchitis due to mycoplasma pneumoniae          |
| H060B | Acute bronchitis due to coxsackievirus                 |
| H060C | Acute bronchitis due to parainfluenza virus            |
| H060D | Acute bronchitis due to respiratory syncytial virus    |
| H060E | Acute bronchitis due to rhinovirus                     |
| H060F | Acute bronchitis due to echovirus                      |
| H060v | Subacute bronchitis unspecified                        |
| H060w | Acute viral bronchitis unspecified                     |
| H060x | Acute bacterial bronchitis unspecified                 |
| H060z | Acute bronchitis NOS                                   |
| H061. | Acute bronchiolitis                                    |
| H0615 | Acute bronchiolitis due to respiratory syncytial virus |
| H0616 | Acute bronchiolitis due to other specified organisms   |
| H062. | Acute lower respiratory tract infection                |
| H06z. | Acute bronchitis or bronchiolitis NOS                  |
| H06z0 | Chest infection NOS                                    |
| H06z1 | Lower resp tract infection                             |
| H06z2 | Recurrent chest infection                              |
| H07.. | Chest cold                                             |
| H1yz0 | Abscess of trachea                                     |
| H2... | Pneumonia and influenza                                |
| H20.. | Viral pneumonia                                        |
| H200. | Pneumonia due to adenovirus                            |
| H201. | Pneumonia due to respiratory syncytial virus           |
| H202. | Pneumonia due to parainfluenza virus                   |
| H203. | Pneumonia due to human metapneumovirus                 |

|       |                                                       |
|-------|-------------------------------------------------------|
| H20y. | Viral pneumonia NEC                                   |
| H20y0 | Severe acute respiratory syndrome                     |
| H20z. | Viral pneumonia NOS                                   |
| H21.. | Lobar (pneumococcal) pneumonia                        |
| H22.. | Other bacterial pneumonia                             |
| H220. | Pneumonia due to klebsiella pneumoniae                |
| H221. | Pneumonia due to pseudomonas                          |
| H222. | Pneumonia due to haemophilus influenzae               |
| H223. | Pneumonia due to streptococcus                        |
| H2230 | Pneumonia due to streptococcus, group B               |
| H224. | Pneumonia due to staphylococcus                       |
| H22y. | Pneumonia due to other specified bacteria             |
| H22y0 | Pneumonia due to escherichia coli                     |
| H22y1 | Pneumonia due to proteus                              |
| H22y2 | Pneumonia - Legionella                                |
| H22yX | Pneumonia due to other aerobic gram-negative bacteria |
| H22yz | Pneumonia due to bacteria NOS                         |
| H22z. | Bacterial pneumonia NOS                               |
| H23.. | Pneumonia due to other specified organisms            |
| H230. | Pneumonia due to Eaton's agent                        |
| H231. | Pneumonia due to mycoplasma pneumoniae                |
| H232. | Pneumonia due to pleuropneumonia like organisms       |
| H233. | Chlamydial pneumonia                                  |
| H23z. | Pneumonia due to specified organism NOS               |
| H24.. | Pneumonia with infectious diseases EC                 |
| H240. | Pneumonia with measles                                |
| H241. | Pneumonia with cytomegalic inclusion disease          |
| H242. | Pneumonia with ornithosis                             |
| H243. | Pneumonia with whooping cough                         |
| H244. | Pneumonia with tularaemia                             |
| H245. | Pneumonia with anthrax                                |
| H246. | Pneumonia with aspergillosis                          |
| H247. | Pneumonia with other systemic mycoses                 |
| H2470 | Pneumonia with candidiasis                            |
| H2471 | Pneumonia with coccidioidomycosis                     |
| H2472 | Pneumonia with histoplasmosis                         |
| H247z | Pneumonia with systemic mycosis NOS                   |
| H24y. | Pneumonia with other infectious diseases EC           |
| H24y0 | Pneumonia with actinomycosis                          |
| H24y1 | Pneumonia with nocardiasis                            |
| H24y2 | Pneumonia with pneumocystis carinii                   |
| H24y3 | Pneumonia with Q-fever                                |
| H24y4 | Pneumonia with salmonellosis                          |
| H24y5 | Pneumonia with toxoplasmosis                          |
| H24y6 | Pneumonia with typhoid fever                          |
| H24y7 | Pneumonia with varicella                              |



|       |                                                              |
|-------|--------------------------------------------------------------|
| H24yz | Pneumonia with other infectious diseases EC NOS              |
| H24z. | Pneumonia with infectious diseases EC NOS                    |
| H25.. | Bronchopneumonia due to unspecified organism                 |
| H26.. | Pneumonia due to unspecified organism                        |
| H260. | Lobar pneumonia due to unspecified organism                  |
| H2600 | Lung consolidation                                           |
| H261. | Basal pneumonia due to unspecified organism                  |
| H262. | Postoperative pneumonia                                      |
| H263. | Pneumonitis, unspecified                                     |
| H270. | Influenza with pneumonia                                     |
| H2700 | Influenza with bronchopneumonia                              |
| H2701 | Influenza with pneumonia, influenza virus identified         |
| H270z | Influenza with pneumonia NOS                                 |
| H28.. | Atypical pneumonia                                           |
| H2B.. | Community acquired pneumonia                                 |
| H2C.. | Hospital acquired pneumonia                                  |
| H2y.. | Other specified pneumonia or influenza                       |
| H2z.. | Pneumonia or influenza NOS                                   |
| H30.. | Bronchitis unspecified                                       |
| H300. | Tracheobronchitis NOS                                        |
| H301. | Laryngotracheobronchitis                                     |
| H302. | Wheezy bronchitis                                            |
| H30z. | Bronchitis NOS                                               |
| H31.. | Chronic bronchitis                                           |
| H310. | Simple chronic bronchitis                                    |
| H3100 | Chronic catarrhal bronchitis                                 |
| H3101 | Smokers' cough                                               |
| H310z | Simple chronic bronchitis NOS                                |
| H311. | Mucopurulent chronic bronchitis                              |
| H3110 | Purulent chronic bronchitis                                  |
| H3111 | Fetid chronic bronchitis                                     |
| H311z | Mucopurulent chronic bronchitis NOS                          |
| H312. | Obstructive chronic bronchitis                               |
| H3120 | Chronic asthmatic bronchitis                                 |
| H3121 | Emphysematous bronchitis                                     |
| H3122 | Acute exacerbation of chronic obstructive airways disease    |
| H312z | Obstructive chronic bronchitis NOS                           |
| H313. | Mixed simple and mucopurulent chronic bronchitis             |
| H31y. | Other chronic bronchitis                                     |
| H31y1 | Chronic tracheobronchitis                                    |
| H31yz | Other chronic bronchitis NOS                                 |
| H31z. | Chronic bronchitis NOS                                       |
| H33zz | Asthma NOS                                                   |
| H341. | Post-infective bronchiectasis                                |
| H3y0. | Chronic obstruct pulmonary dis with acute lower resp infectn |
| H530. | Abscess of lung                                              |

|       |                                                            |
|-------|------------------------------------------------------------|
| H5300 | Single lung abscess                                        |
| H5301 | Multiple lung abscess                                      |
| H5303 | Abscess of lung with pneumonia                             |
| H530z | Abscess of lung NOS                                        |
| H5400 | Hypostatic pneumonia                                       |
| H5401 | Hypostatic bronchopneumonia                                |
| H5832 | Eosinophilic bronchitis                                    |
| Hyu08 | [X]Other viral pneumonia                                   |
| Hyu09 | [X]Pneumonia due to other aerobic gram-negative bacteria   |
| Hyu0A | [X]Other bacterial pneumonia                               |
| Hyu0B | [X]Pneumonia due to other specified infectious organisms   |
| Hyu0C | [X]Pneumonia in bacterial diseases classified elsewhere    |
| Hyu0D | [X]Pneumonia in viral diseases classified elsewhere        |
| Hyu0E | [X]Pneumonia in mycoses classified elsewhere               |
| Hyu0F | [X]Pneumonia in parasitic diseases classified elsewhere    |
| Hyu0G | [X]Pneumonia in other diseases classified elsewhere        |
| Hyu0H | [X]Other pneumonia, organism unspecified                   |
| Hyu1. | [X]Other acute lower respiratory infections                |
| Hyu10 | [X]Acute bronchitis due to other specified organisms       |
| Hyu11 | [X]Acute bronchiolitis due to other specified organisms    |
| Hyu6. | [X]Suppurative & necrotic conditions of lower respir tract |
| SP131 | Other aspiration pneumonia as a complication of care       |
| SP132 | Post operative chest infection                             |
| X1004 | Infection of lower respiratory tract                       |
| X1006 | Chest infection - unspecified bronchitis                   |
| X1007 | Acute bacterial bronchitis                                 |
| X1009 | Acute mycoplasmal bronchitis                               |
| X100A | Acute chlamydial bronchitis                                |
| X100B | Acute viral bronchitis                                     |
| X100C | Acute viral bronchiolitis                                  |
| X100d | Rickettsial pneumonia                                      |
| X100D | Acute bronchiolitis due to adenovirus                      |
| X100e | Glandular fever pneumonia                                  |
| X100E | Pneumonia                                                  |
| X100g | Herpes simplex pneumonia                                   |
| X100G | Atypical pneumonia                                         |
| X100h | Giant cell pneumonia                                       |
| X100H | Bacterial pneumonia                                        |
| X100j | Chronic bronchial sepsis                                   |
| X100J | Pneumococcal pneumonia                                     |
| X100K | Pneumonic plague                                           |
| X100L | Meningococcal pneumonia                                    |
| X100M | Bronchopneumonia                                           |
| X100N | Chlamydial pneumonia                                       |
| X100O | Neonatal chlamydial pneumonia                              |
| X100R | Fungal pneumonia                                           |

|       |                                                              |
|-------|--------------------------------------------------------------|
| X100S | Pulmonary mucormycosis                                       |
| X100V | Chronic pulmonary coccidioidomycosis                         |
| X100W | Pulmonary blastomycosis                                      |
| X100X | Haemorrhagic pneumonia                                       |
| X100Y | Mycobacterial pneumonia                                      |
| X101i | Chron obstruct pulmonary dis wth acute exacerbation, unspec  |
| X101j | Occupational chronic bronchitis                              |
| X1038 | Lupus pneumonia                                              |
| X104j | Tuberculous bronchopleural fistula                           |
| X104k | Bronchial sepsis                                             |
| X104U | Tracheal sepsis                                              |
| X70Ra | Chronic pulmonary African histoplasmosis                     |
| X70Rg | Chronic pulmonary blastomycosis                              |
| X70RK | Acute pulmonary histoplasmosis capsulati                     |
| X70RL | Chronic pulmonary histoplasmosis capsulati                   |
| X70RZ | Acute pulmonary African histoplasmosis                       |
| X70Ua | Capillaria aerophila chest infection                         |
| Xa0IY | Lobar pneumonia                                              |
| Xa0IZ | Asthmatic bronchitis                                         |
| Xa0Y7 | Non-tuberculous mycobacterial pneumonia                      |
| Xa35I | Acute infective exacerbation chronic obstruct airway disease |
| Xa7nL | Basal pneumonia                                              |
| Xa7nM | Left lower zone pneumonia                                    |
| Xa7nN | Right lower zone pneumonia                                   |
| Xa7nP | Left upper zone pneumonia                                    |
| Xa7nT | Right middle zone pneumonia                                  |
| Xa7nU | Right upper zone pneumonia                                   |
| Xa97Z | Pulmonary mycobacterium avium-intracellulare infection       |
| Xaa7C | Eosinophilic bronchitis                                      |
| XaBE9 | Basal pneumonia due to unspecified organism                  |
| XaBfJ | Secondary bacterial pneumonia                                |
| XaBM8 | Recurrent chest infection                                    |
| XaDcD | Bacterial lower respiratory infection                        |
| XaDcV | Viral lower respiratory infection                            |
| XaDsa | Infective pneumonia                                          |
| XaDtB | Acute infective bronchitis                                   |
| XaDth | Acute infective tracheobronchitis                            |
| XaDtl | Legionnaire's disease                                        |
| XaDtP | Bronchitis                                                   |
| XaFrU | Postoperative pneumonia                                      |
| XaJEI | Bilateral pneumonia                                          |
| XaREU | Aspergillus bronchitis                                       |
| XaYby | Hantavirus pulmonary syndrome                                |
| XaYYt | Acute bronchiolitis due to human metapneumovirus             |
| XaYYu | Pneumonia due to human metapneumovirus                       |
| XaZ1k | Community acquired pneumonia                                 |

|       |                                                            |
|-------|------------------------------------------------------------|
| XaZ1I | Hospital acquired pneumonia                                |
| XE0Qw | Whooping cough                                             |
| XE0Xr | Acute bronchitis                                           |
| XE0Xs | Chest infection NOS                                        |
| XE0Xt | Acute lower respiratory tract infection                    |
| XE0YG | Viral pneumonia                                            |
| XE0YH | Pneumococcal lobar pneumonia                               |
| XE0YI | Pneumonia with infectious diseases EC                      |
| XE0YJ | Bronchopneumonia due to unspecified organism               |
| XE0YL | Bronchitis unspecified                                     |
| XE0YM | Purulent chronic bronchitis                                |
| XE0Yt | Acute: [bronchitis]/[chest infections]/[tracheobronchitis] |
| XE0ZF | Pneumonia and influenza &/or pneumonia                     |
| XE0ZH | Pneumonia: [lobar] or [pneumococcal]                       |
| XE0ZN | Chronic: [bronchitis NOS] or [tracheobronchitis]           |
| XE2b5 | Psittacosis                                                |
| XM0rv | Pneumonia NOS                                              |
| XM1QV | Infection of lower respiratory tract and mediastinum       |
| XM1QX | Acute wheezy bronchitis                                    |
| XSCET | Bacterial infection due to <i>Klebsiella pneumoniae</i>    |

**Appendix 3: Table 1 extended: Demographic features of unmatched and matched populations commencing either extrafine fixed dose beclometasone or fine fixed dose fluticasone**

| Variable                                           |                       | Unmatched                       |                                | Matched                           |                               |
|----------------------------------------------------|-----------------------|---------------------------------|--------------------------------|-----------------------------------|-------------------------------|
|                                                    |                       | Initiating ef-FDC-BDP<br>n=9740 | Initiating fp-FDC-F<br>n=10308 | Initiating ef-FDC-BDP<br>n = 6658 | Initiating fp-FDC-F<br>n=6658 |
| Season of index date                               | Spring, n (%)         | 2215 (22.7)                     | 2176 (21.1)                    | 1828 (27.5)                       | 1954 (29.3)                   |
|                                                    | Summer, n (%)         | 2681 (27.5)                     | 3038 (29.5)                    | 1545 (23.2)                       | 1434 (21.5)                   |
|                                                    | Autumn, n (%)         | 2286 (23.5)                     | 2271 (22.0)                    | 1568 (23.6)                       | 1399 (21.0)                   |
|                                                    | Winter, n (%)         | 2558 (26.3)                     | 2823 (27.4)                    | 1717 (25.8)                       | 1871 (28.1)                   |
| <b>Comorbidities</b>                               |                       |                                 |                                |                                   |                               |
| Mental disorder                                    | Yes, n (%)            | 191 (2.0)                       | 210 (2.0)                      | 127 (1.9)                         | 134 (2.0)                     |
| Glaucoma                                           | Yes, n (%)            | 328 (3.4)                       | 313 (3.0)                      | 217 (3.3)                         | 194 (2.9)                     |
| Cataract                                           | Yes, n (%)            | 1321 (13.6)                     | 1374 (13.3)                    | 855 (12.8)                        | 849 (12.8)                    |
| Atrial fibrillation                                | Yes, n (%)            | 702 (7.2)                       | 753 (7.3)                      | 474 (7.1)                         | 467 (7.0)                     |
| Moderate renal impairment                          | Yes, n (%)            | 983 (10.1)                      | 1151 (11.2)                    | 664 (10.0)                        | 659 (9.9)                     |
| Pneumonia in baseline                              | Yes, n (%)            | 210 (2.2)                       | 191 (1.9)                      | 135 (2.0)                         | 135 (2.0)                     |
| LAMA before index date                             | No LAMA, n (%)        | 6221 (63.9)                     | 6049 (58.7)                    | 4234 (63.6)                       | 4249 (63.8)                   |
|                                                    | Glycopyrronium, n (%) | 481 (4.9)                       | 372 (3.6)                      | 313 (4.7)                         | 317 (4.8)                     |
|                                                    | Tiotropium, n (%)     | 2269 (23.3)                     | 2486 (24.1)                    | 1526 (22.9)                       | 1499 (22.5)                   |
|                                                    | Aclidinium, n (%)     | 406 (4.2)                       | 253 (2.5)                      | 224 (3.4)                         | 218 (3.3)                     |
|                                                    | Umeclidinium, n (%)   | 363 (3.7)                       | 1148 (11.1)                    | 361 (5.4)                         | 375 (5.6)                     |
| ICS, prescriptions in the year prior to index date | 0, n (%)              | 6336 (65.1)                     | 7724 (74.9)                    | 4731 (71.1)                       | 4756 (71.4)                   |
|                                                    | 1-2, n (%)            | 1146 (11.8)                     | 1019 (9.9)                     | 692 (10.4)                        | 717 (10.8)                    |
|                                                    | 3-5, n (%)            | 1074 (11.0)                     | 716 (6.9)                      | 600 (9.0)                         | 541 (8.1)                     |
|                                                    | 6-9, n (%)            | 757 (7.8)                       | 556 (5.4)                      | 418 (6.3)                         | 422 (6.3)                     |

|                                                  |            |             |             |             |             |
|--------------------------------------------------|------------|-------------|-------------|-------------|-------------|
|                                                  | ≥10, n (%) | 427 (4.4)   | 293 (2.8)   | 217 (3.3)   | 222 (3.3)   |
| LABA (mono or FDC) prescriptions                 | 0, n (%)   | 7939 (81.5) | 8217 (79.7) | 5461 (82.0) | 5448 (81.8) |
|                                                  | 1-2, n (%) | 475 (4.9)   | 543 (5.3)   | 305 (4.6)   | 338 (5.1)   |
|                                                  | 3-5, n (%) | 436 (4.5)   | 462 (4.5)   | 279 (4.2)   | 277 (4.2)   |
|                                                  | 6-9, n (%) | 431 (4.4)   | 531 (5.2)   | 273 (4.1)   | 283 (4.3)   |
|                                                  | ≥10, n (%) | 459 (4.7)   | 555 (5.4)   | 340 (5.1)   | 312 (4.7)   |
| LAMA prescriptions                               | 0, n (%)   | 6221 (63.9) | 6049 (58.7) | 4234 (63.6) | 4249 (63.8) |
|                                                  | 1-2, n (%) | 848 (8.7)   | 998 (9.7)   | 557 (8.4)   | 595 (8.9)   |
|                                                  | 3-5, n (%) | 821 (8.4)   | 938 (9.1)   | 558 (8.4)   | 526 (7.9)   |
|                                                  | 6-9, n (%) | 807 (8.3)   | 1058 (10.3) | 549 (8.2)   | 587 (8.8)   |
|                                                  | ≥10, n (%) | 1043 (10.7) | 1265 (12.3) | 760 (11.4)  | 701 (10.5)  |
| SABA prescriptions                               | ≥1, n (%)  | 7468 (76.7) | 7597 (73.7) | 4856 (72.9) | 4822 (72.4) |
| SAMA prescriptions                               | ≥1, n (%)  | 389 (4.0)   | 388 (3.8)   | 260 (3.9)   | 239 (3.6)   |
| Theophylline prescriptions                       | ≥1, n (%)  | 52 (0.5)    | 83 (0.8)    | 40 (0.6)    | 51 (0.8)    |
| Leukotriene Receptor Antagonists prescriptions   | ≥1, n (%)  | 106 (1.1)   | 90 (0.9)    | 66 (1.0)    | 62 (0.9)    |
| Macrolides prescriptions                         | 0, n (%)   | 8188 (84.1) | 8509 (82.5) | 5603 (84.2) | 5522 (82.9) |
|                                                  | 1, n (%)   | 990 (10.2)  | 1184 (11.5) | 667 (10.0)  | 764 (11.5)  |
|                                                  | 2, n (%)   | 321 (3.3)   | 350 (3.4)   | 220 (3.3)   | 224 (3.4)   |
|                                                  | 3, n (%)   | 117 (1.2)   | 134 (1.3)   | 81 (1.2)    | 75 (1.1)    |
|                                                  | 4, n (%)   | 59 (0.6)    | 62 (0.6)    | 44 (0.7)    | 31 (0.5)    |
|                                                  | ≥5, n (%)  | 65 (0.7)    | 69 (0.7)    | 43 (0.6)    | 42 (0.6)    |
| Mucolytics prescriptions                         | ≥1 n (%)   | 636 (6.7)   | 695 (6.7)   | 418 (6.3)   | 440 (6.6)   |
| Maintenance OCS prescriptions                    | ≥1, n (%)  | 231 (2.4)   | 254 (2.5)   | 141 (2.1)   | 146 (2.2)   |
| Oral corticosteroids, average daily dose for all | 0, n (%)   | 5172 (53.1) | 5645 (54.8) | 3679 (55.3) | 3670 (55.1) |

prescriptions,  
(acute and long-  
term, mg)

|                                                     |                   |             |             |             |             |
|-----------------------------------------------------|-------------------|-------------|-------------|-------------|-------------|
|                                                     | >0 <2.5, n (%)    | 3922 (40.3) | 3980 (38.6) | 2577 (38.7) | 2550 (38.3) |
|                                                     | ≥2.5, n (%)       | 646 (6.7)   | 683 (6.7)   | 402 (6.1)   | 438 (6.6)   |
| Influenza<br>vaccination                            | Yes, n (%)        | 4720 (48.5) | 4338 (42.1) | 2948 (44.3) | 2951 (44.3) |
| Pneumococcal<br>vaccination                         | Yes, n (%)        | 1164 (12.0) | 1200 (11.6) | 717 (10.8)  | 752 (11.3)  |
| Exacerbations in<br>the year prior to<br>index date | 0, n (%)          | 3902 (40.1) | 4214 (40.9) | 2798 (42.0) | 2741 (41.2) |
|                                                     | 1, n (%)          | 2583 (26.5) | 2826 (27.4) | 1765 (26.5) | 1839 (27.6) |
|                                                     | ≥2, n (%)         | 3255 (33.4) | 3268 (31.7) | 2095 (31.5) | 2078 (31.2) |
| Acute OCS<br>courses                                | 0, n (%)          | 5611 (57.6) | 6130 (59.5) | 3969 (59.6) | 3978 (59.7) |
|                                                     | 1, n (%)          | 2226 (22.9) | 2305 (22.4) | 1478 (22.2) | 1501 (22.5) |
|                                                     | 2, n (%)          | 1013 (10.4) | 972 (9.4)   | 663 (10.0)  | 602 (9.0)   |
|                                                     | 3, n (%)          | 468 (4.8)   | 460 (4.5)   | 296 (4.4)   | 286 (4.3)   |
|                                                     | 4, n (%)          | 203 (2.1)   | 222 (2.2)   | 126 (1.9)   | 147 (2.2)   |
|                                                     | ≥5, n (%)         | 219 (2.2)   | 219 (2.1)   | 126 (1.9)   | 144 (2.2)   |
| Antibiotics courses                                 | 0, n (%)          | 5586 (57.4) | 5972 (57.9) | 3913 (58.8) | 3897 (58.5) |
|                                                     | 1, n (%)          | 2232 (22.9) | 2383 (23.1) | 1538 (23.1) | 1515 (22.8) |
|                                                     | ≥2, n (%)         | 1922 (19.7) | 1953 (19.0) | 1207 (18.1) | 1246 (18.7) |
| FEV1 % predicted<br>in 5-years period               | N (% non-missing) | 8091        | 8797        | 5530 (83.1) | 5478 (82.3) |
|                                                     | <30, n (%)        | 326 (4.0)   | 346 (3.9)   | 223 (4.0)   | 207 (3.8)   |
|                                                     | 30 <50, n (%)     | 1704 (21.1) | 2047 (23.3) | 1238 (22.4) | 1217 (22.2) |
|                                                     | 50 <80, n (%)     | 4145 (51.2) | 4529 (51.5) | 2830 (51.2) | 2804 (51.2) |
|                                                     | ≥80, n (%)        | 1916 (23.7) | 1875 (21.3) | 1239 (22.4) | 1250 (22.8) |

**Abbreviations:** ef-FDC-BDP: extrafine particle fixed dose beclometasone; fp-FDC-F: fine-particle fixed dose fluticasone; FEV1: forced expiratory volume in one second; ICS, inhaled corticosteroid; LABA: long-acting beta agonist; LAMA: long-acting muscarinic antagonist; OCS: Oral corticosteroids; SABA: short acting beta agonist; SAMA: short acting muscarinic antagonists.
